# Supplementary material for: Endothelial discoidin domain receptor 1 senses flow to modulate YAP activation
Source: PubMed Central journal article supplement (PMC10576099; doi:10.1038/s41467-023-42341-z), 2023-10-13
Supplement: 41467_2023_42341_MOESM3_ESM.pdf [file 41467_2023_42341_MOESM3_ESM.pdf]

## **Description of Additional Supplementary Files**

**File name: Supplementary Movie 1**

**Description: Three-dimensional reconstruction of DDR1 droplets in HUVECs under the static conditions.** HUVECs were infected with DDR1-EGFP recombinant adenovirus and seeded on gelatin-coated microfluidic chamber.

**File name: Supplementary Movie 2**

**Description: Three-dimensional reconstruction of DDR1 droplets in HUVECs subjected to laminar flow for 2 minutes.** HUVECs were infected with DDR1-EGFP recombinant adenovirus, seeded on microfluidic chamber and then subjected to laminar flow for 2 minutes.
